# Supplementary material for: Effect of Chain Structure on the Various Properties of the Copolymers of Fluorinated Norbornenes with Cyclooctene
Source: MDPI journal article supplement (doi:10.3390/polym15092157), 2023-04-30
Supplement: s1 [file s1]

## Supplementary Materials

# Effect of Chain Structure on the Various Properties of the Copolymers of Fluorinated Norbornenes with Cyclooctene

Olga A. Adzhieva<sup>1</sup>, Maria L. Gringolts<sup>1,\*</sup>, Yulia I. Denisova<sup>1</sup>, Georgiy A. Shandryuk<sup>1</sup>, Ekaterina A. Litmanovich<sup>1,2</sup>, Roman Yu. Nikiforov<sup>1</sup>, Nikolay A. Belov<sup>1</sup> and Yaroslav V. Kudryavtsev<sup>1,3,4,\*</sup>

<sup>1</sup> Topchiev Institute of Petrochemical Synthesis, Russian Academy of Sciences, Leninskii pr. 29, 119991 Moscow, Russia; adzhieva@ips.ac.ru (O.A.A.); denisova@ips.ac.ru (Y.I.D.); gosha@ips.ac.ru (G.A.S.); elitmanovich@yandex.ru (E.A.L.); nru@ips.ac.ru (R.Y.N.); belov@ips.ac.ru (N.A.B.)

<sup>2</sup> Faculty of Chemistry, Lomonosov Moscow State University, Leninskie Gory 1, Bld. 3, 119991 Moscow, Russia

<sup>3</sup> Frumkin Institute of Physical Chemistry and Electrochemistry, Russian Academy of Sciences, Leninskii pr. 31, 119071 Moscow, Russia

<sup>4</sup> ESPCI Paris, PSL Research University, 75005 Paris, France

\* Correspondence: gringol@ips.ac.ru (M.L.G.); yar@ips.ac.ru (Y.V.K.)

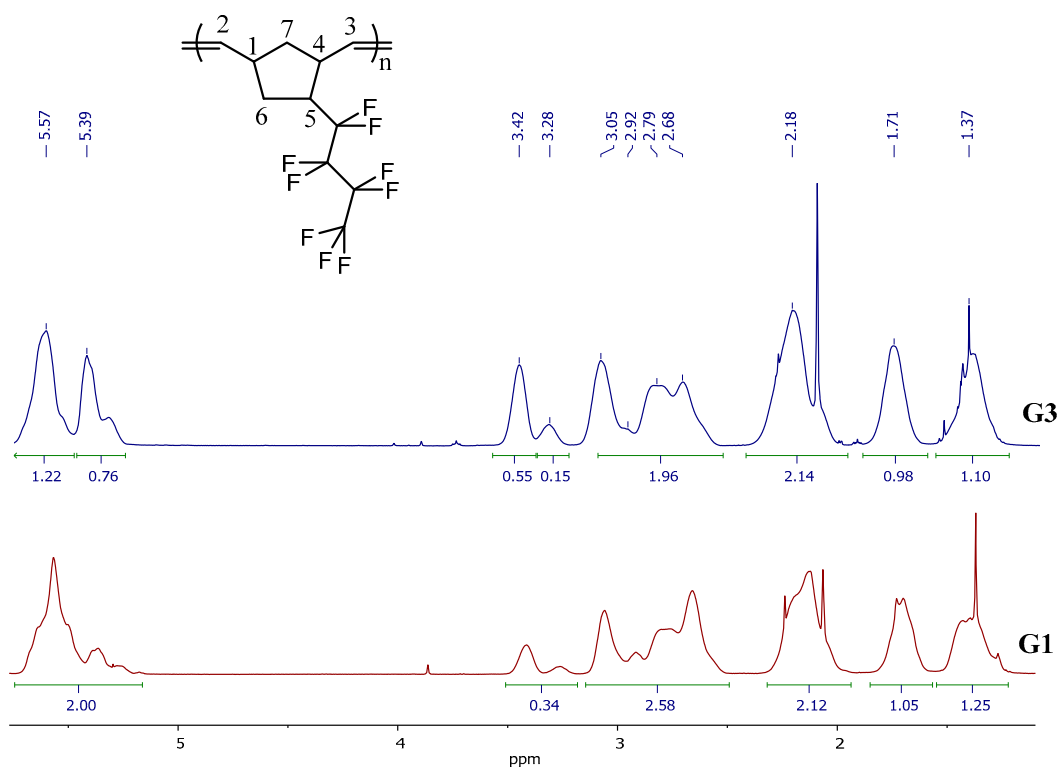

**Figure S1.** <sup>1</sup>H NMR spectra of poly(5-perfluorobutyl-2-norbornene) (PNBF) obtained on the G1 and G3 catalysts at room temperature.

$^1\text{H}$  NMR (400.1 MHz,  $\text{CDCl}_3/\text{C}_6\text{F}_6$ )  $\delta$ , ppm: 5.57 ( $\text{CH}=\text{CH}$ , *trans*), 5.39 ( $\text{CH}=\text{CH}$ , *cis*), 3.42 ( $\text{HC}^5$ , *cis*, *endo*), 3.28 ( $\text{HC}^5$ , *cis*, *exo*), 3.05 ( $\text{HC}^5$ , *trans*, *endo*), 2.92 ( $\text{HC}^5$ , *trans*, *exo*), 2.79 ( $\text{HC}^{1,4}$ , *cis*), 2.68 ( $\text{HC}^{1,4}$ , *trans*), 2.18 ( $\text{H}_2\text{C}^6$ ), 1.71–1.37 ( $\text{H}_2\text{C}^7$ ).

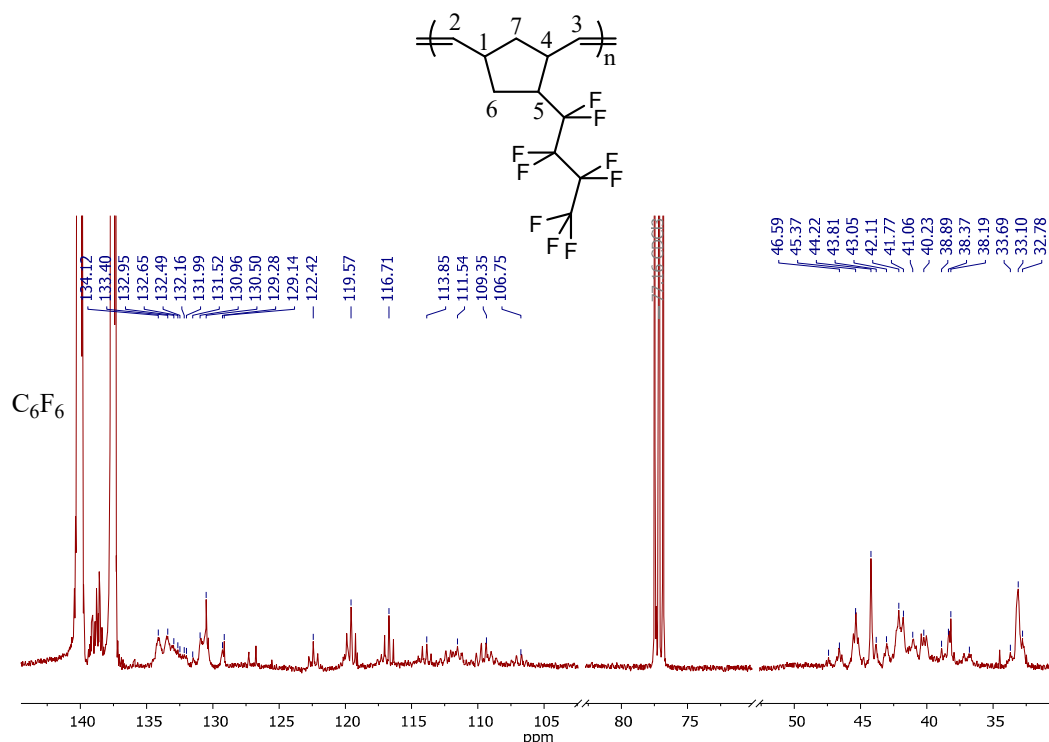

**Figure S2.**  $^{13}\text{C}$  NMR spectrum of poly(5-perfluorobutyl-2-norbornene) (PNBF) at room temperature.

$^{13}\text{C}$  NMR (100.6 MHz,  $\text{CDCl}_3/\text{C}_6\text{F}_6$ )  $\delta$ , ppm: 134.12–132.16 ( $\text{C}=\text{C}$ , *cis/trans*), 131.99–130.96 ( $\text{C}=\text{C}$ ), 130.50 ( $\text{C}^3$ , *trans*), 129.28, 129.14 ( $\text{C}^3$ , *cis*), 122.42, 119.57, 116.71, 113.85, 111.54, 109.35, 106.75 (CF), 47.41 ( $\text{C}^5$ , *exo*, *cis*), 46.59 ( $\text{C}^5$ , *exo*, *trans*), 45.37 ( $\text{C}^5$ , *endo*, *cis/trans*), 44.22, 43.81 ( $\text{C}^1$ ), 43.05 ( $\text{C}^7$ ), 42.11, 41.77, 41.06, 40.23 ( $\text{C}^4$ ,  $\text{C}^7$ ), 38.89, 38.37, 38.19, 36.78 ( $\text{C}^1$ ,  $\text{C}^4$ ), 33.69–32.78 ( $\text{C}^6$ ).

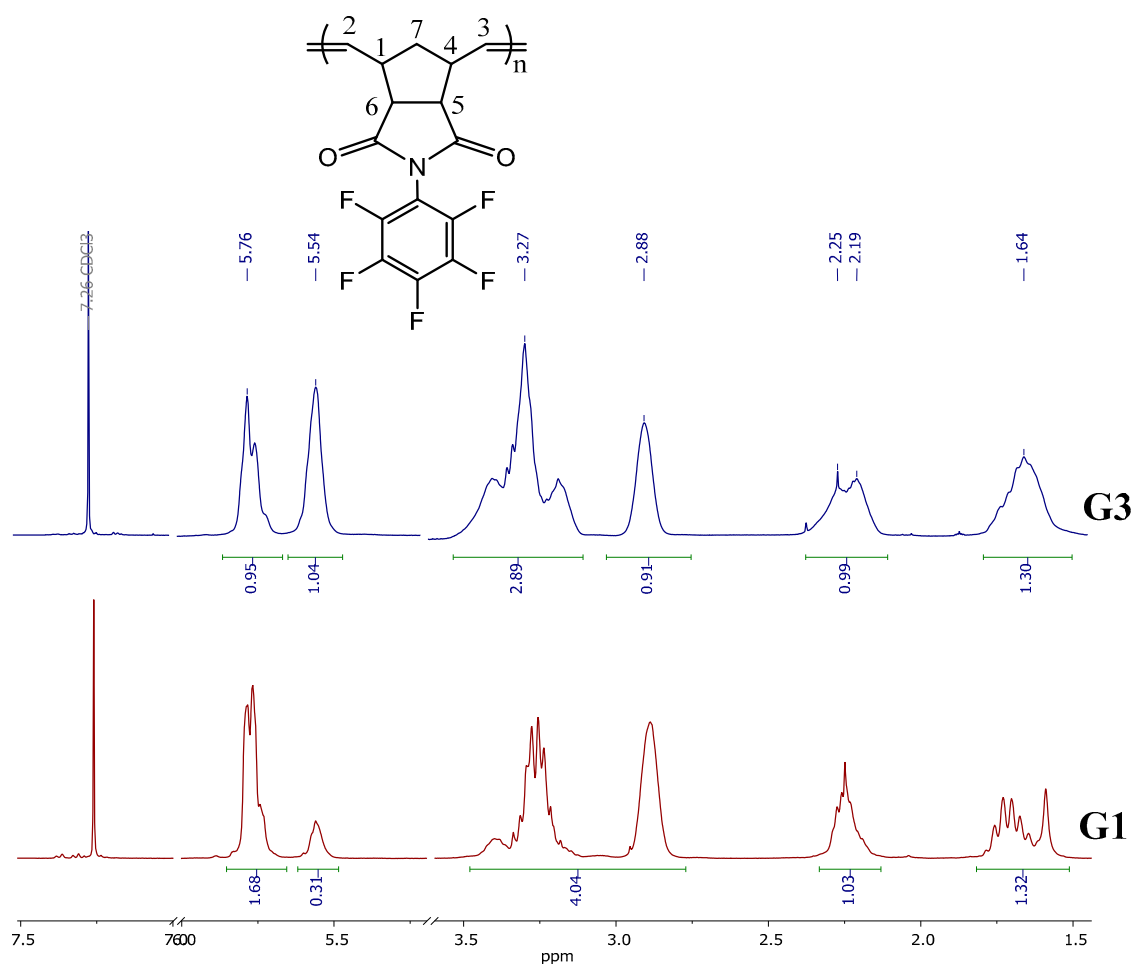

**Figure S3.**  $^1\text{H}$  NMR spectra of poly(pentafluorophenyl-norbornene-5,6-dicarboximide) (PNBFD) obtained on the G1 and G3 catalysts at room temperature.

$^1\text{H}$  NMR (400.1 MHz,  $\text{CDCl}_3$ )  $\delta$ , ppm: 5.76 ( $\text{CH=CH}$ , *trans*), 5.54 ( $\text{CH=CH}$ , *cis*), 3.27 (3H), 2.88 (1H), 2.25, 2.19 (1H), 1.64 (1H).

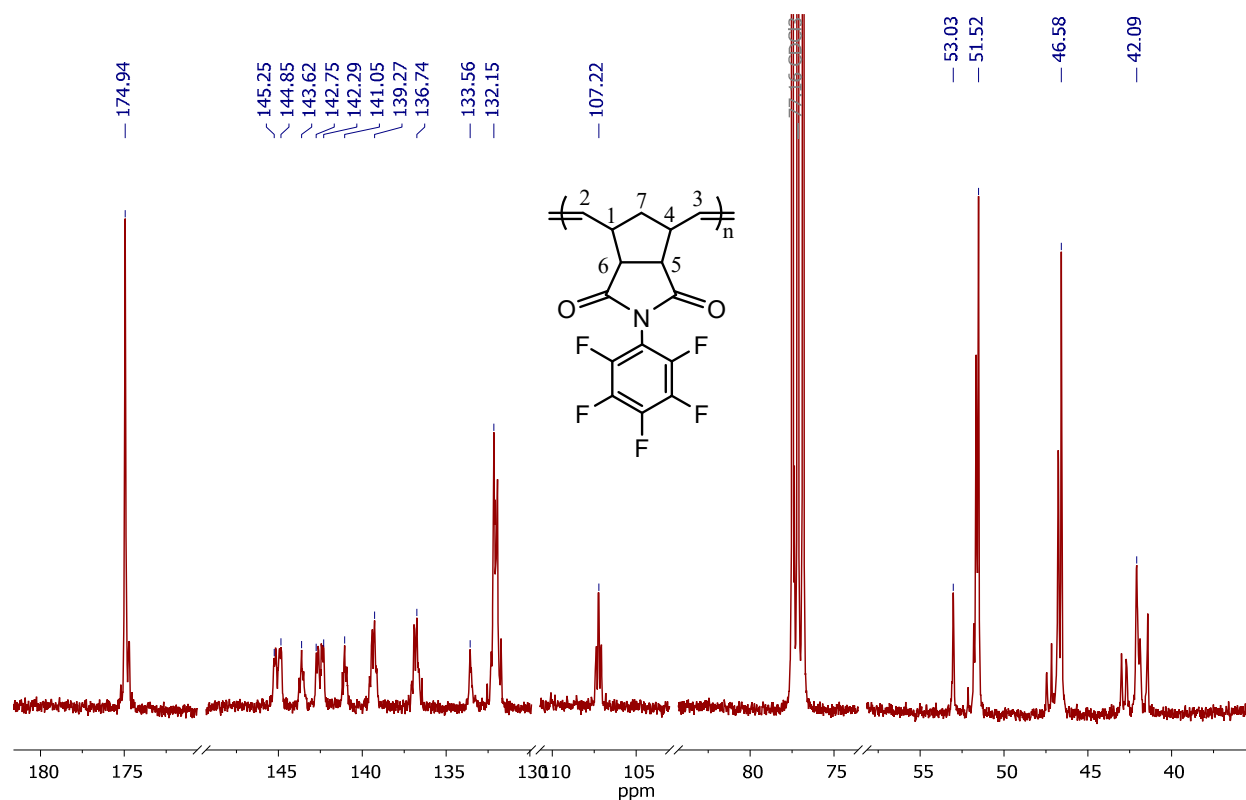

**Figure S4.**  $^{13}\text{C}$  NMR spectrum of poly(pentafluorophenyl-norbornene-5,6-dicarboximide) (PNBFD) at room temperature.

$^{13}\text{C}$  NMR (100.6 MHz,  $\text{CDCl}_3$ )  $\delta$ , ppm: 174.94 (C=O), 145.25, 144.85, 143.62, 142.75, 142.29, 141.05, 139.27, 136.74 (CF), 133.56 (C=C, *cis*), 132.15 (C=C, *trans*), 107.22 (C-N), 53.03 ( $\text{C}^{1,4}$ , *cis*), 51.52 ( $\text{C}^{1,4}$ , *trans*), 46.58, 42.09.

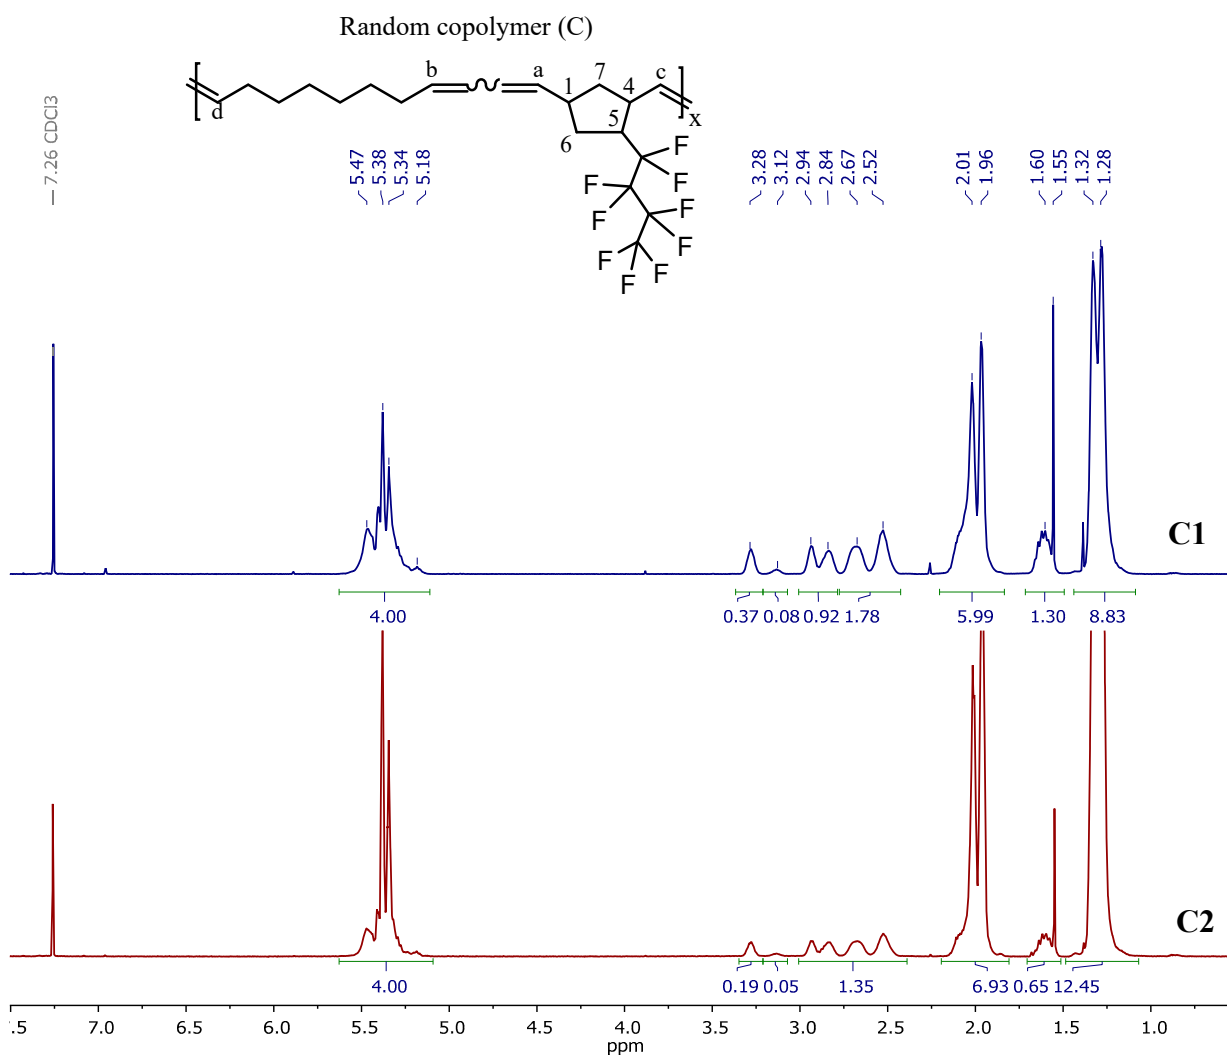

**Figure S5.**  $^1\text{H}$  NMR spectra of NBF–COE random C1 and C2 copolymers at room temperature.

$^1\text{H}$  NMR (400.1 MHz,  $\text{CDCl}_3$ )  $\delta$ , ppm: 5.47, 5.38, 5.34, 5.18 ( $\text{HC}=\text{CH}$ , PNBf, PCOE), 3.28 ( $\text{HC}^5$ , *cis*, *endo*, PNBf), 3.12 ( $\text{HC}^5$ , *cis*, *exo*, PNBf), 2.94 ( $\text{HC}^5$ , *trans*, *endo*, PNBf), 2.84 ( $\text{HC}^5$ , *trans*, *exo*, PNBf), 2.67 ( $\text{HC}^{1,4}$ , *cis*, PNBf), 2.52 ( $\text{HC}^{1,4}$ , *trans*, PNBf), 2.01, 1.96 ( $\text{H}_2\text{C}^6$ , PNBf; 4H, PCOE), 1.60, 1.55 ( $\text{H}_2\text{C}^7$ , PNBf), 1.32, 1.28 ( $\text{H}_2\text{C}^7$ , PNBf; 8H, PCOE).

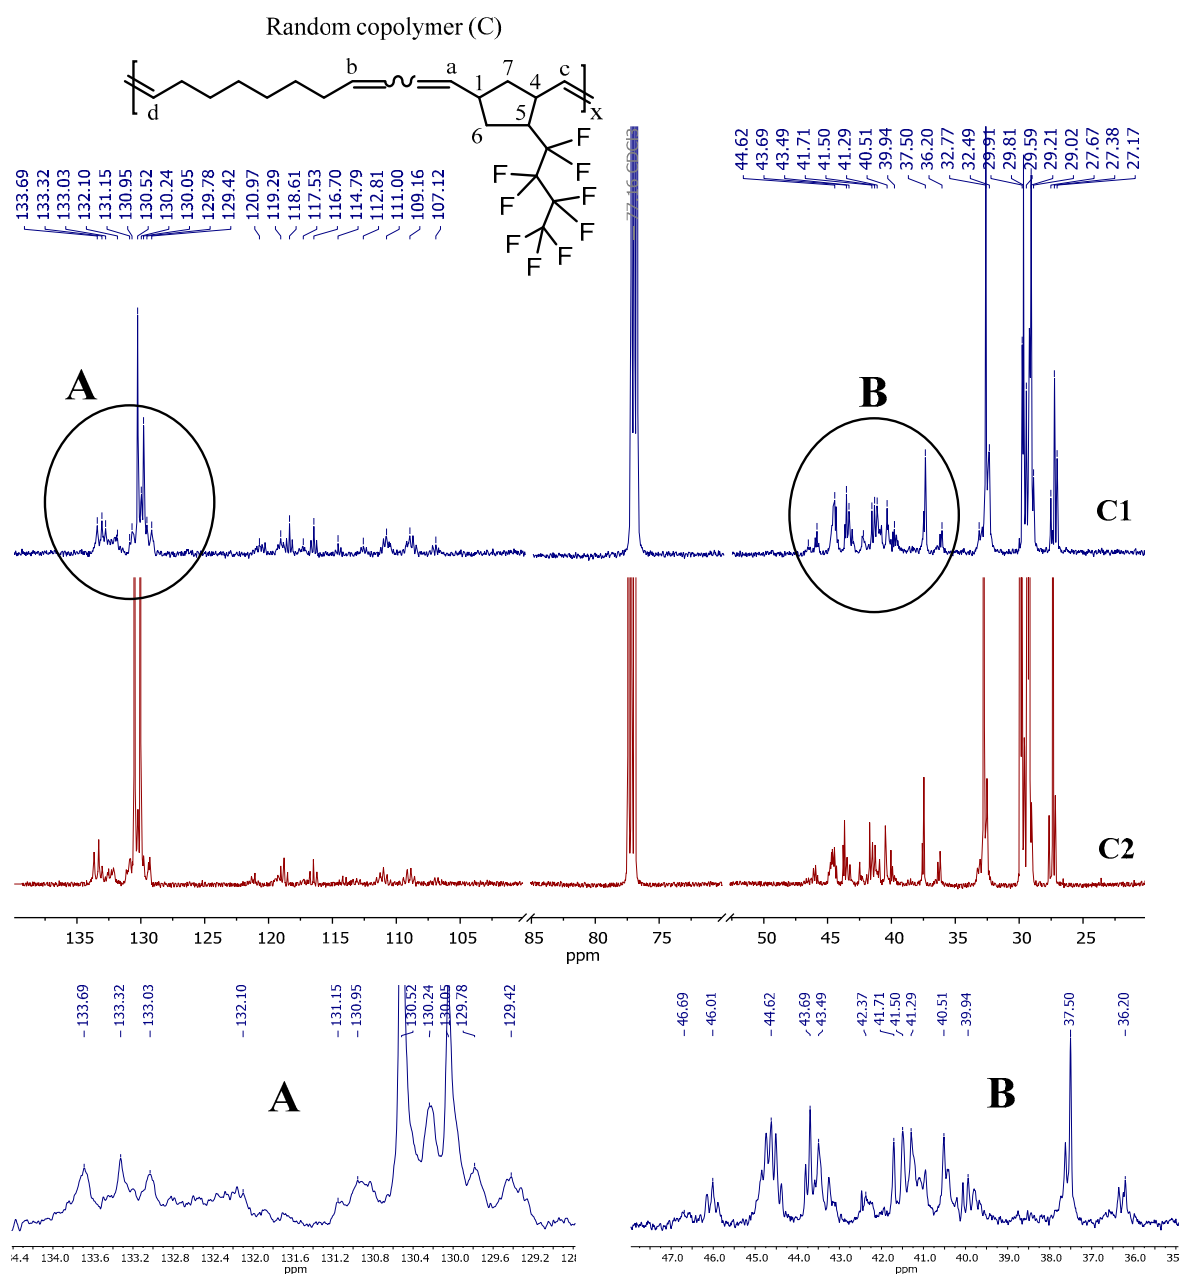

**Figure S6.**  $^{13}\text{C}$  NMR spectra of NBF–COE random C1 and C2 copolymers at room temperature.

$^{13}\text{C}$  NMR (100.6 MHz,  $\text{CDCl}_3$ )  $\delta$ , ppm: 133.69, 133.32, 133.03, 132.10, 131.15, 130.95 (C=C, PNBf), 130.52 (C=C *trans*, PCOE), 130.24 (C=C, PNBf), 130.05 (C=C *cis*, PCOE), 129.78, 129.42 (C=C, PNBf), 120.97, 119.29, 118.61, 117.53, 116.70, 114.79, 112.81, 111.00, 109.16, 107.12 (C-F), 46.69 ( $\text{C}^5$ , *exo*, *cis*, PNBf), 46.01 ( $\text{C}^5$ , *exo*, *trans*, PNBf), 44.62 ( $\text{C}^5$ , *endo*, *cis/trans*, PNBf), 43.69, 43.49 ( $\text{C}^1$ , PNBf), 42.37, 41.47, 41.50, 41.29, 40.51, 39.94 ( $\text{C}^{4,7}$ , PNBf), 37.50, 36.20 ( $\text{C}^{1,4}$ , PNBf), 32.77, 32.49 ( $\text{C}^6$ , PNBf;  $\text{CH}_2$ , PCOE), 29.91, 29.81, 29.59, 29.21, 29.02, 27.67, 27.38, 27.17 ( $\text{CH}_2$ , PCOE).

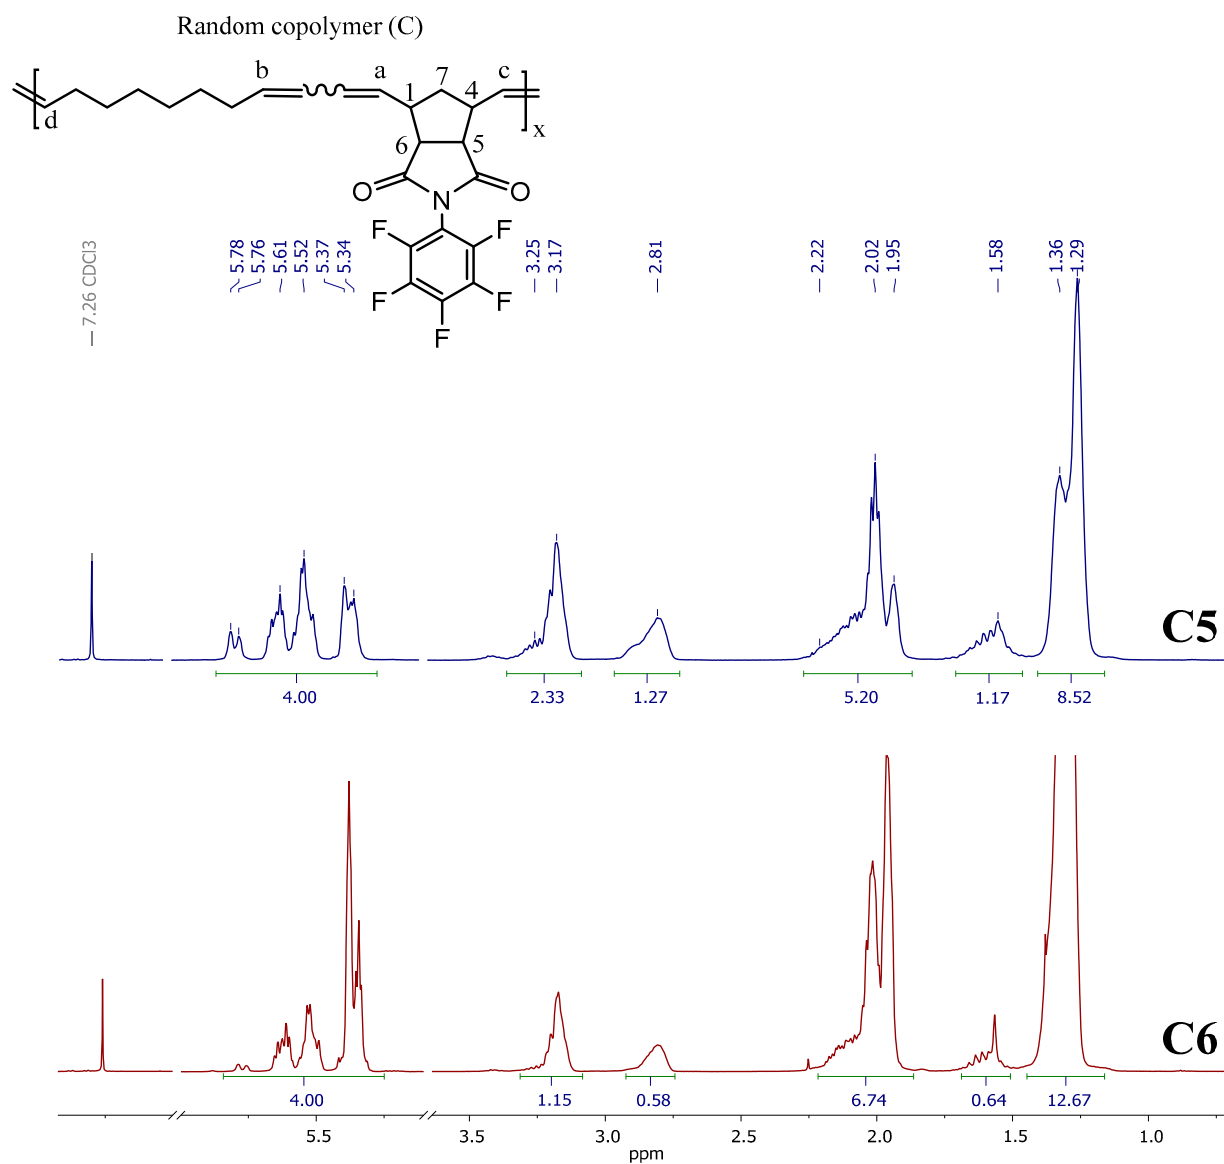

**Figure S7.**  $^1\text{H}$  NMR spectra of NBFD–COE random C5 and C6 copolymers at room temperature.

$^1\text{H}$  NMR (400.1 MHz,  $\text{CDCl}_3$ )  $\delta$ , ppm: 5.78 ( $\text{HC}^{\text{a}}=\text{C}^{\text{c}}\text{H}$  *trans*, PNBFD), 5.61 (heterodyad  $\text{HC}^{\text{a}}=\text{C}^{\text{b}}\text{H}$ ), 5.52 ( $\text{HC}^{\text{a}}=\text{C}^{\text{c}}\text{H}$  *cis*, PNBFD; heterodyad  $\text{HC}^{\text{a}}=\text{C}^{\text{b}}\text{H}$ ), 5.37 ( $\text{HC}^{\text{b}}=\text{C}^{\text{d}}\text{H}$  *trans*, PCOE), 5.34 ( $\text{HC}^{\text{b}}=\text{C}^{\text{d}}\text{H}$  *cis*, PCOE), 3.25–3.17 (PNBFD), 2.81 (PNBFD), 2.22, 2.02 (PNBFD), 1.95 (PCOE), 1.58 (PNBFD), 1.36, 1.29 (PCOE, PNBFD).

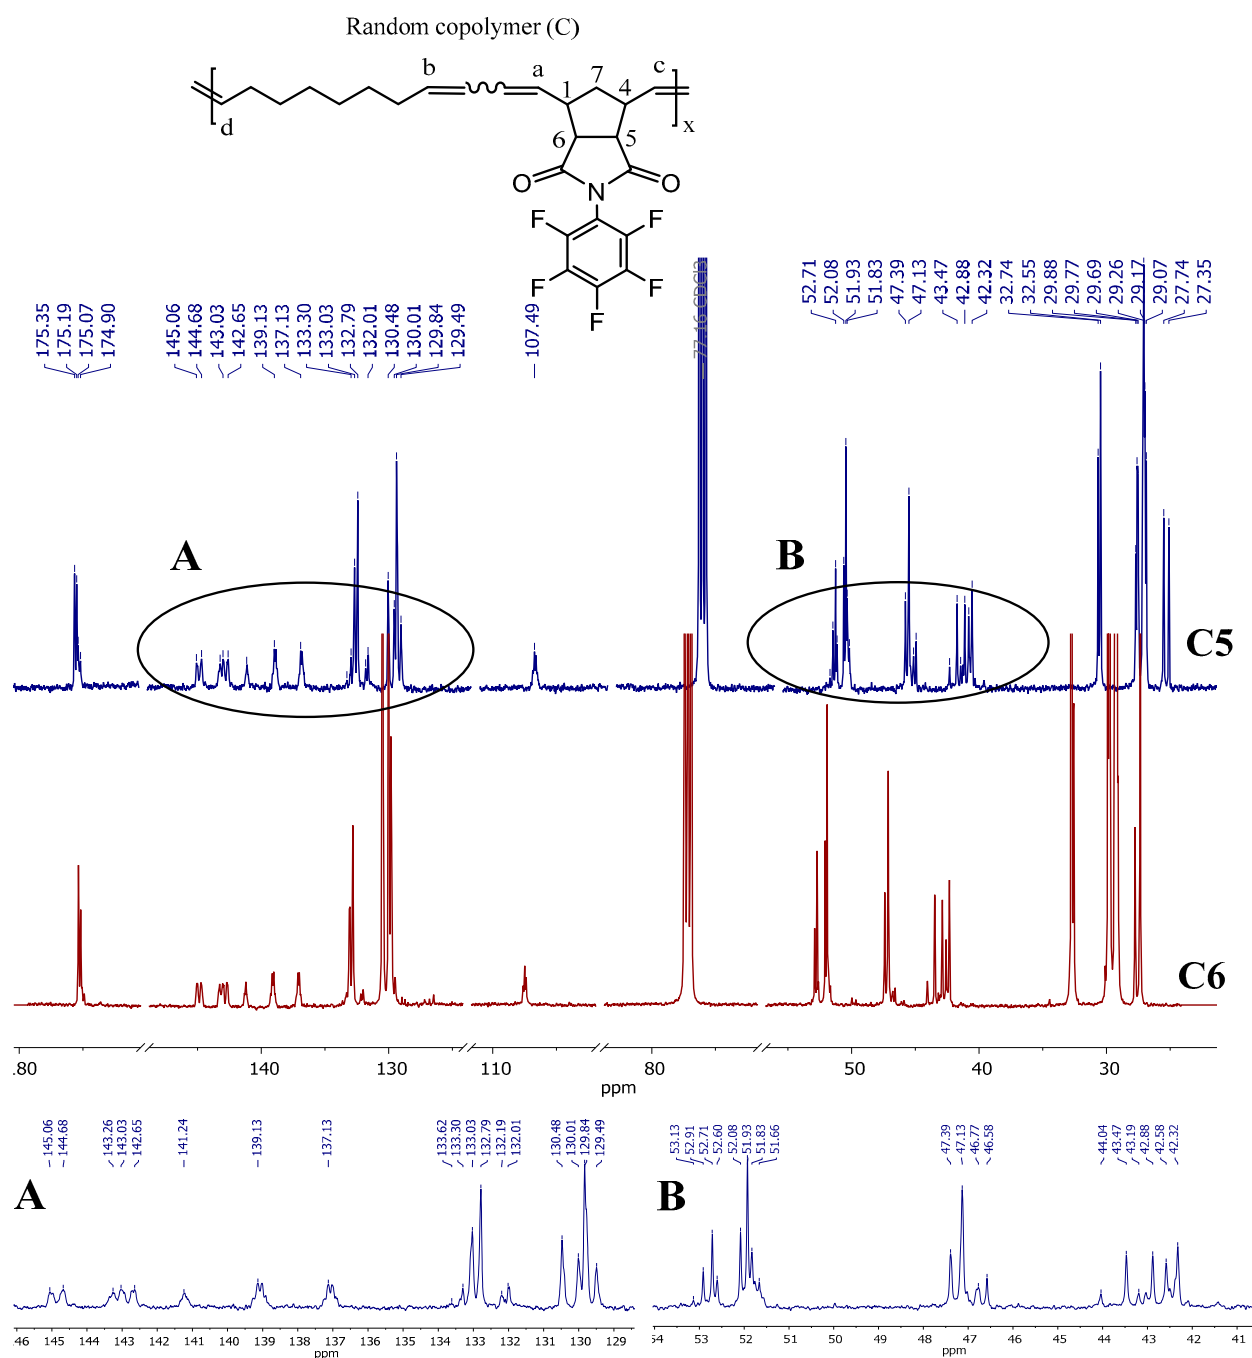

**Figure S8.**  $^{13}\text{C}$  NMR spectra of NBFD–COE random C5 and C6 copolymers at room temperature.

$^{13}\text{C}$  NMR (100.6 MHz,  $\text{CDCl}_3$ )  $\delta$ , ppm: 175.35, 175.19, 175.07, 174.90 (C=O), 145.06, 144.68, 143.26, 143.03, 142.65, 141.24, 139.13, 137.13 (C-F), 133.62 ( $\text{HC}^{\text{a}}=\text{C}^{\text{h}}$  *cis*, PNBFD), 133.30, 133.03, 132.79 (heterodyad  $\text{C}^{\text{a}}=\text{C}^{\text{b}}$ ), 132.19, 132.01 ( $\text{HC}^{\text{a}}=\text{C}^{\text{h}}$  *trans*, PNBFD), 130.48 ( $\text{HC}^{\text{b}}=\text{C}^{\text{d}}$  *trans*, PCOE), 130.01 ( $\text{HC}^{\text{b}}=\text{C}^{\text{d}}$  *cis*, PCOE), 129.84, 129.49 (heterodyad  $\text{C}^{\text{a}}=\text{C}^{\text{b}}$ ), 107.49 (C-N), 53.13, 52.91, 52.71, 52.60 ( $\text{C}^{1,4}$ , *cis*, PNBFD), 52.08, 51.93, 51.83, 51.66 ( $\text{C}^{1,4}$ , *trans*, PNBFD), 47.39, 47.13, 46.77, 46.58, 44.04, 43.47, 43.19, 42.88, 42.58, 42.32 ( $\text{C}^{5,6,7}$ , PNBFD), 32.74, 32.55, 29.88, 29.77, 29.69, 29.26, 29.17, 29.07, 27.74, 27.35 ( $\text{CH}_2$ , PCOE).

The average lengths of NBFD and COE blocks in the copolymers,  $L_{\text{NBFD}}$  and  $L_{\text{COE}}$ , were calculated from the integral intensities of homo- (NBFD–NBFD (133.62, 132.19, 132.01 ppm), COE–COE



(130.48, 130.01 ppm)) and hetero- (NBFD–COE (133.30, 133.03, 132.79 ppm), COE–NBFD (129.84, 129.49)) dyad signals in  $^{13}\text{C}$  NMR spectra:

$$L_{\text{NBFD}} = \frac{I(\text{C} = \text{C}_{\text{NBFD-COE}}) + I(\text{C} = \text{C}_{\text{NBFD-NBFD}})}{I(\text{C} = \text{C}_{\text{NBFD-COE}})}$$

$$L_{\text{COE}} = \frac{I(\text{C} = \text{C}_{\text{COE-NBFD}}) + I(\text{C} = \text{C}_{\text{COE-COE}})}{I(\text{C} = \text{C}_{\text{COE-NBFD}})}$$

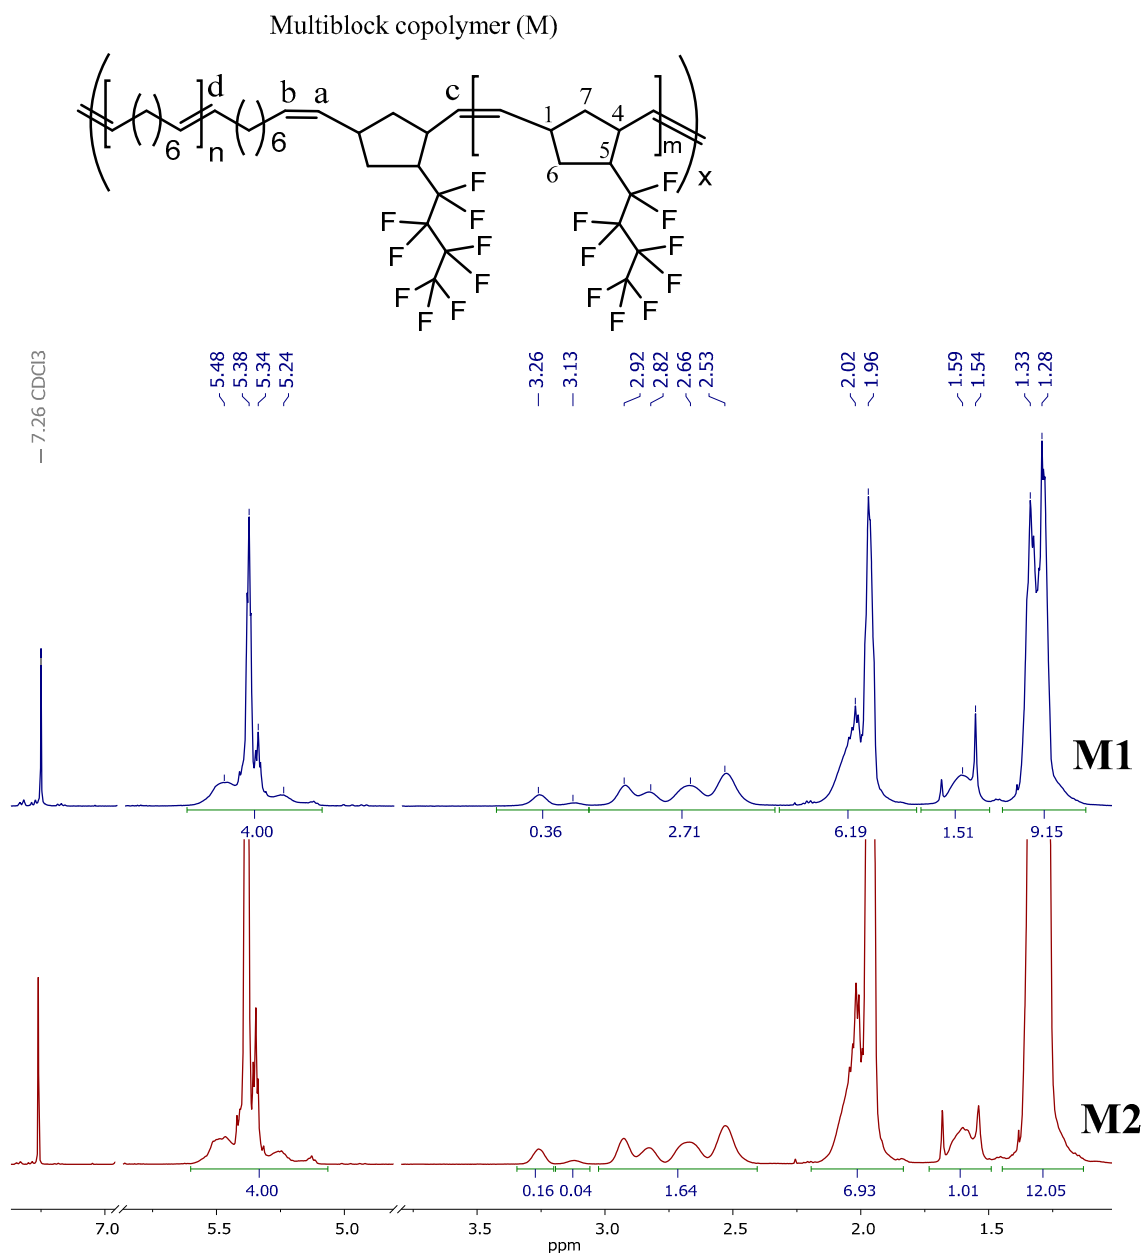

**Figure S9.**  $^1\text{H}$  NMR spectra of NBFD–COE multiblock M1 and M2 copolymers at room temperature.

$^1\text{H}$  NMR (400.1 MHz,  $\text{CDCl}_3$ )  $\delta$ , ppm: 5.48, 5.38, 5.34, 5.24 ( $\text{HC}=\text{CH}$ , PNBf, PCOE), 3.26 ( $\text{HC}^5$ , *cis*, *endo*, PNBf), 3.13 ( $\text{HC}^5$ , *cis*, *exo*, PNBf), 2.92 ( $\text{HC}^5$ , *trans*, *endo*, PNBf), 2.82 ( $\text{HC}^5$ , *trans*, *exo*, PNBf), 2.66 ( $\text{HC}^{1,4}$ , *cis*, PNBf), 2.53 ( $\text{HC}^{1,4}$ , *trans*, PNBf), 2.02, 1.96 ( $\text{H}_2\text{C}^6$ , PNBf; 4H, PCOE), 1.59, 1.54 ( $\text{H}_2\text{C}^7$ , PNBf), 1.33, 1.28 ( $\text{H}_2\text{C}^7$ , PNBf; 8H, PCOE).

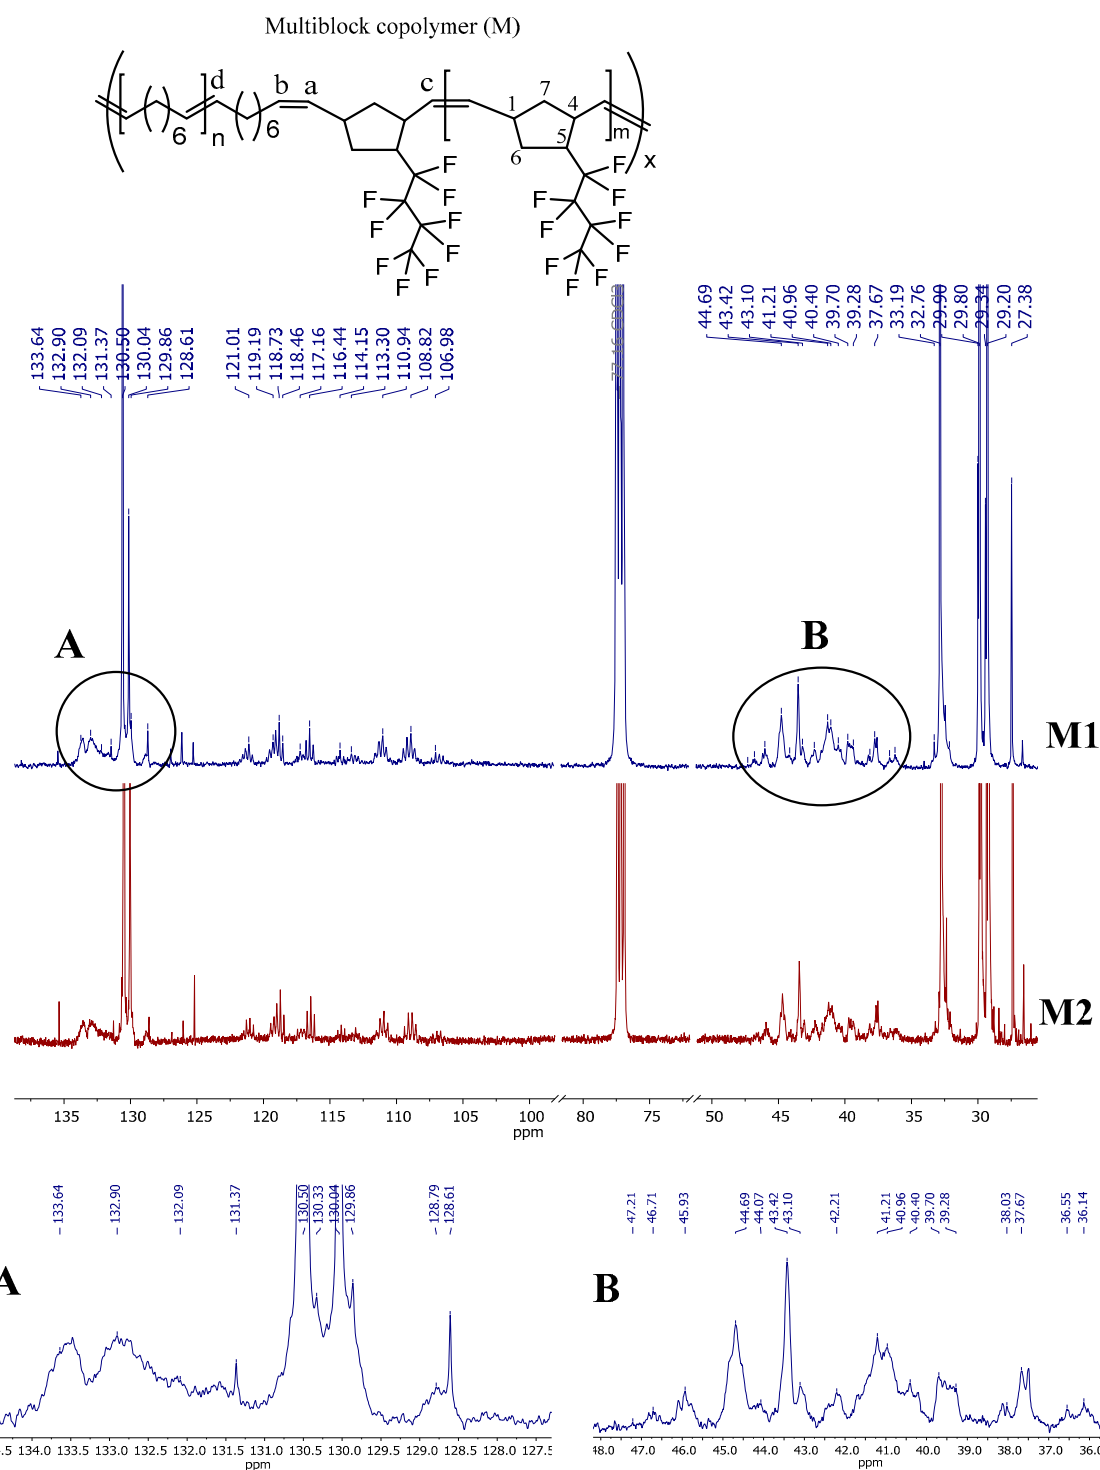

**Figure S10.**  $^{13}\text{C}$  NMR spectra of NBF-COE multiblock M1 and M2 copolymers at room temperature.

$^{13}\text{C}$  NMR (100.6 MHz,  $\text{CDCl}_3$ )  $\delta$ , ppm: 133.64, 132.90, 132.09, 131.37 (C=C, PNBf), 130.50 (C=C *trans*, PCOE), 130.33 (C=C, PNBf), 130.04 (C=C *cis*, PCOE), 129.86, 128.79, 128.61 (C=C, PNBf), 121.01, 119.19, 118.73, 118.46, 117.16, 116.44, 114.15, 113.30, 110.94, 108.82, 106.98 (C-F), 47.21 ( $\text{C}^5$ , *exo*, *cis*, PNBf), 46.71 ( $\text{C}^5$ , *exo*, *trans*, PNBf), 45.93 ( $\text{C}^5$ , *endo*, *cis/trans*, PNBf), 44.69, 44.07 ( $\text{C}^1$ , PNBf), 43.42, 43.10 ( $\text{C}^7$ , PNBf), 42.21, 41.21, 40.96, 40.40, 39.70, 39.28 ( $\text{C}^{4,7}$ , PNBf), 38.03, 37.67, 36.55, 36.14 ( $\text{C}^{1,4}$ , PNBf), 33.19, 32.76, 32.05 ( $\text{C}^6$ , PNBf;  $\text{CH}_2$ , PCOE), 29.90, 29.80, 29.34, 29.20, 27.38 ( $\text{CH}_2$ , PCOE).

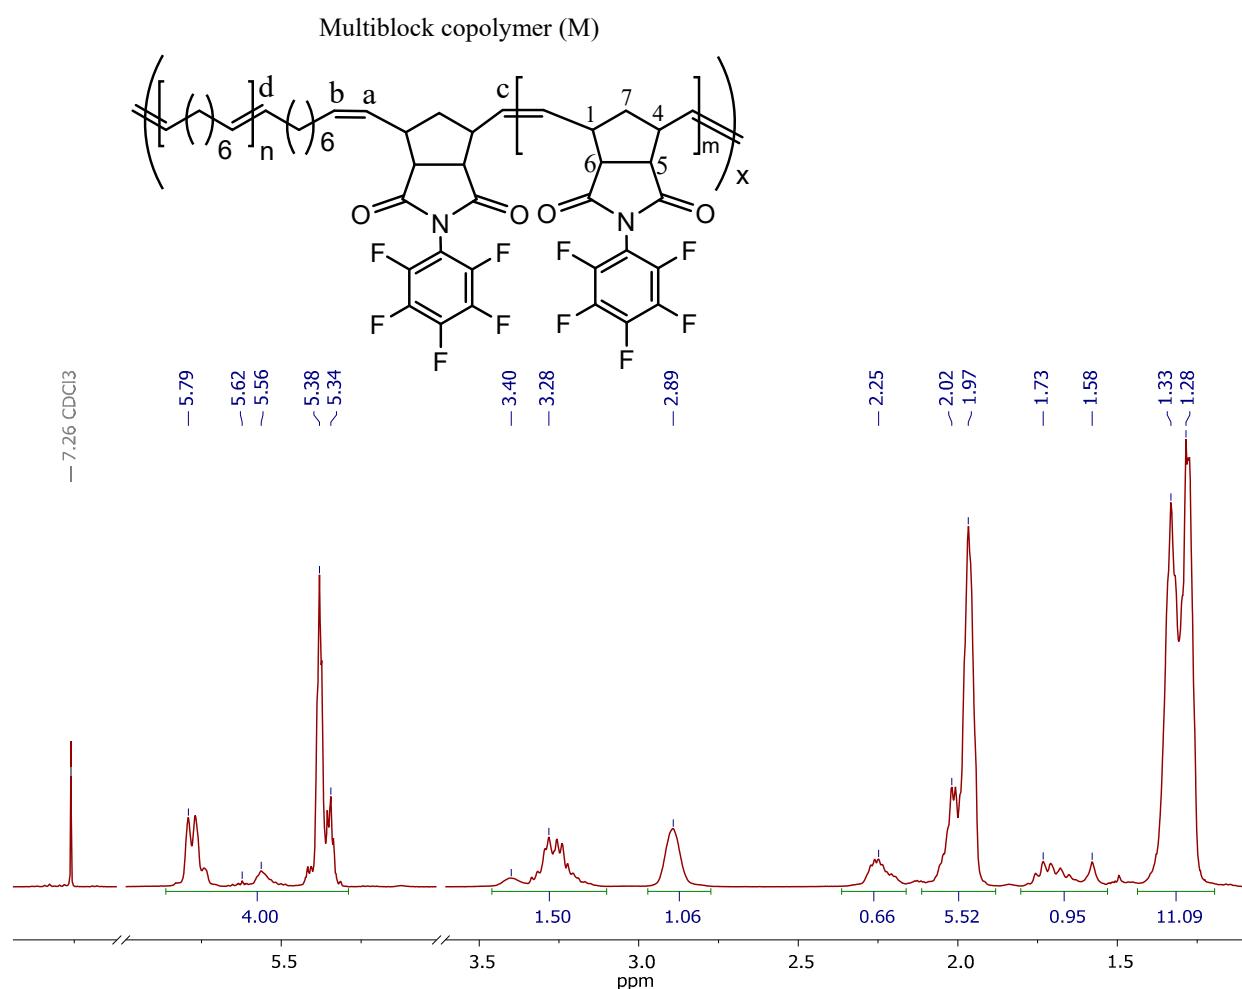

**Figure S11.**  $^1H$  NMR spectrum of NBFD–COE multiblock M4 copolymer at room temperature.

$^1H$  NMR (400.1 MHz,  $CDCl_3$ )  $\delta$ , ppm: 5.79 ( $HC^a=C^cH$  *trans*, PNBFD), 5.62 (heterodyad  $HC^a=C^bH$ ), 5.56 ( $HC^a=C^cH$  *cis*, PNBFD; heterodyad  $HC^a=C^bH$ ), 5.38 ( $HC^b=C^dH$  *trans*, PCOE), 5.34 ( $HC^b=C^dH$  *cis*, PCOE), 3.40, 3.28, 2.89 (PNBFD), 2.25, 2.02 (PNBFD), 1.97 (PCOE), 1.73, 1.58 (PNBFD), 1.33, 1.28 (PCOE, PNBFD).

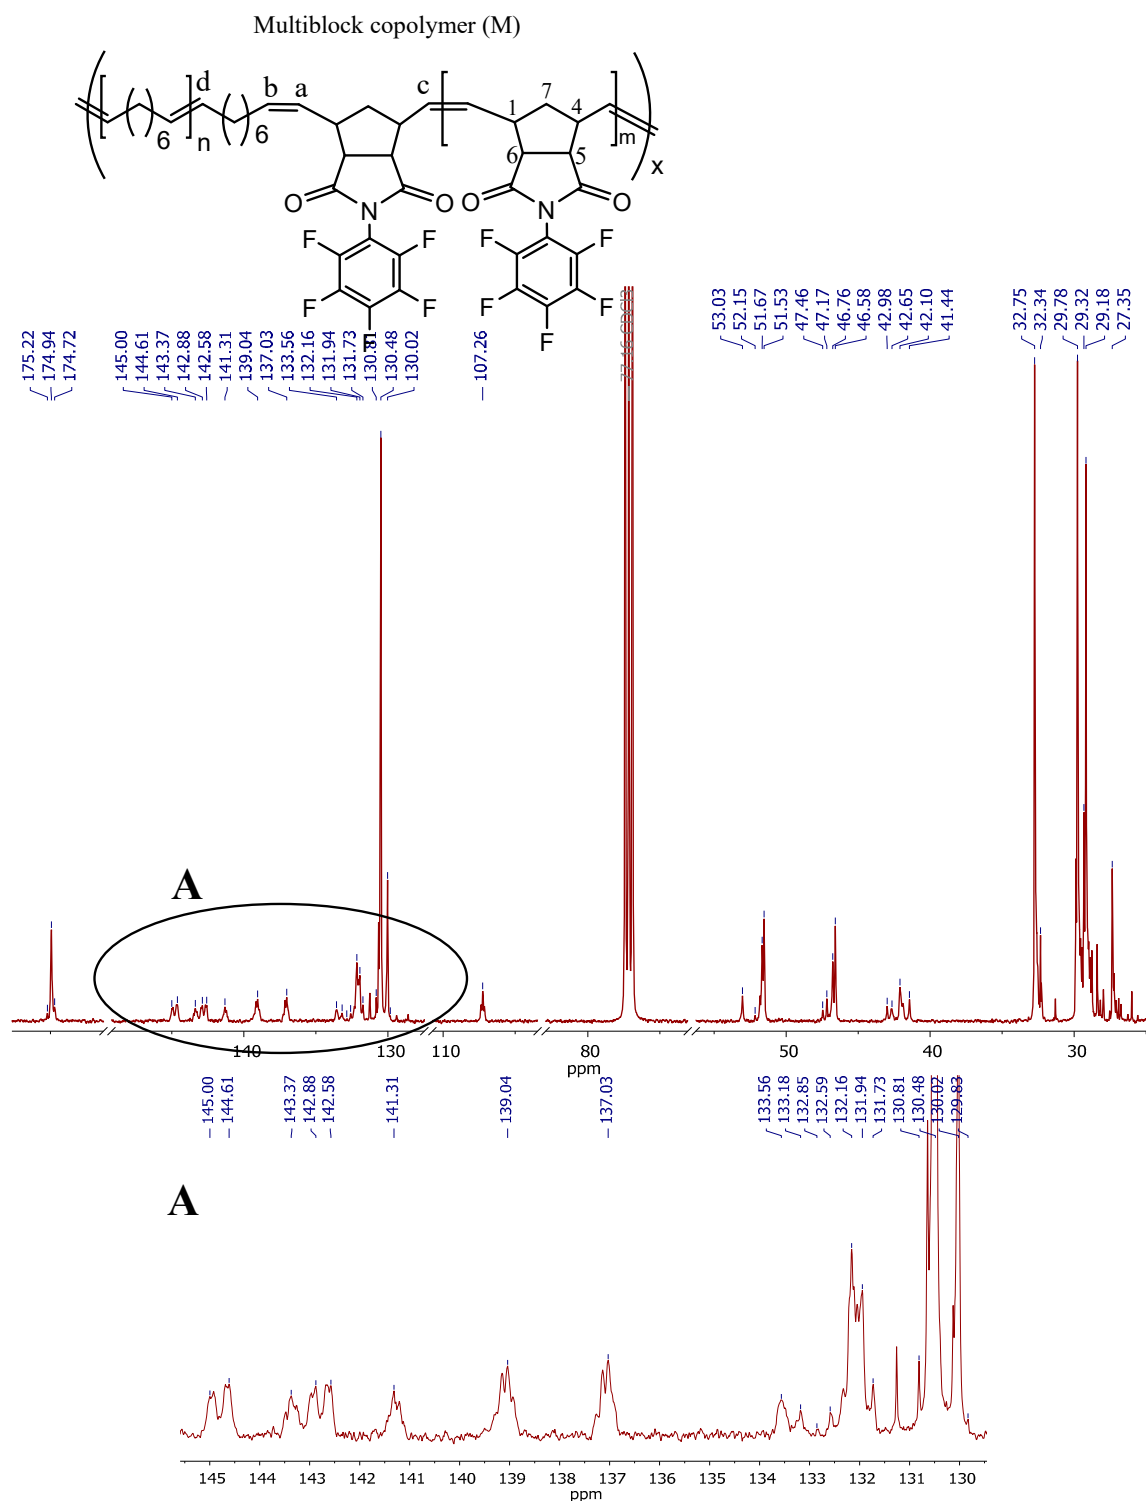

**Figure S12.**  $^{13}\text{C}$  NMR spectrum of NBFD–COE multiblock M4 copolymer at room temperature.

$^{13}\text{C}$  NMR (100.6 MHz,  $\text{CDCl}_3$ )  $\delta$ , ppm: 175.22, 174.94, 174.72 ( $\text{C}=\text{O}$ ), 145.00, 144.61, 143.37, 142.88, 142.58, 141.31, 139.04, 137.03 ( $\text{C}-\text{F}$ ), 133.56, 133.18 ( $\text{HC}^{\text{a}}=\text{C}^{\text{eH}}$  *cis*, PNBFD), 132.85 (heterodyad  $\text{C}^{\text{a}}=\text{C}^{\text{b}}$ ), 132.59, 132.16, 131.94, 131.73 ( $\text{HC}^{\text{a}}=\text{C}^{\text{eH}}$  *trans*, PNBFD), 130.48 ( $\text{HC}^{\text{b}}=\text{C}^{\text{dH}}$  *trans*, PCOE), 130.02 ( $\text{HC}^{\text{b}}=\text{C}^{\text{dH}}$  *cis*, PCOE), 129.83 (heterodyad  $\text{C}^{\text{a}}=\text{C}^{\text{b}}$ ), 107.26 ( $\text{C}-\text{N}$ ), 53.03 ( $\text{C}^{1,4}$ , *cis*, PNBFD), 52.15, 51.67, 51.53 ( $\text{C}^{1,4}$ , *trans*, PNBFD), 47.46, 47.17, 46.76, 46.58, 42.98, 42.65, 42.10, 41.44 ( $\text{C}^{5,6,7}$ , PNBFD), 32.75, 32.34, 29.78, 29.32, 29.18, 28.77, 27.35 ( $\text{CH}_2$ , PCOE).

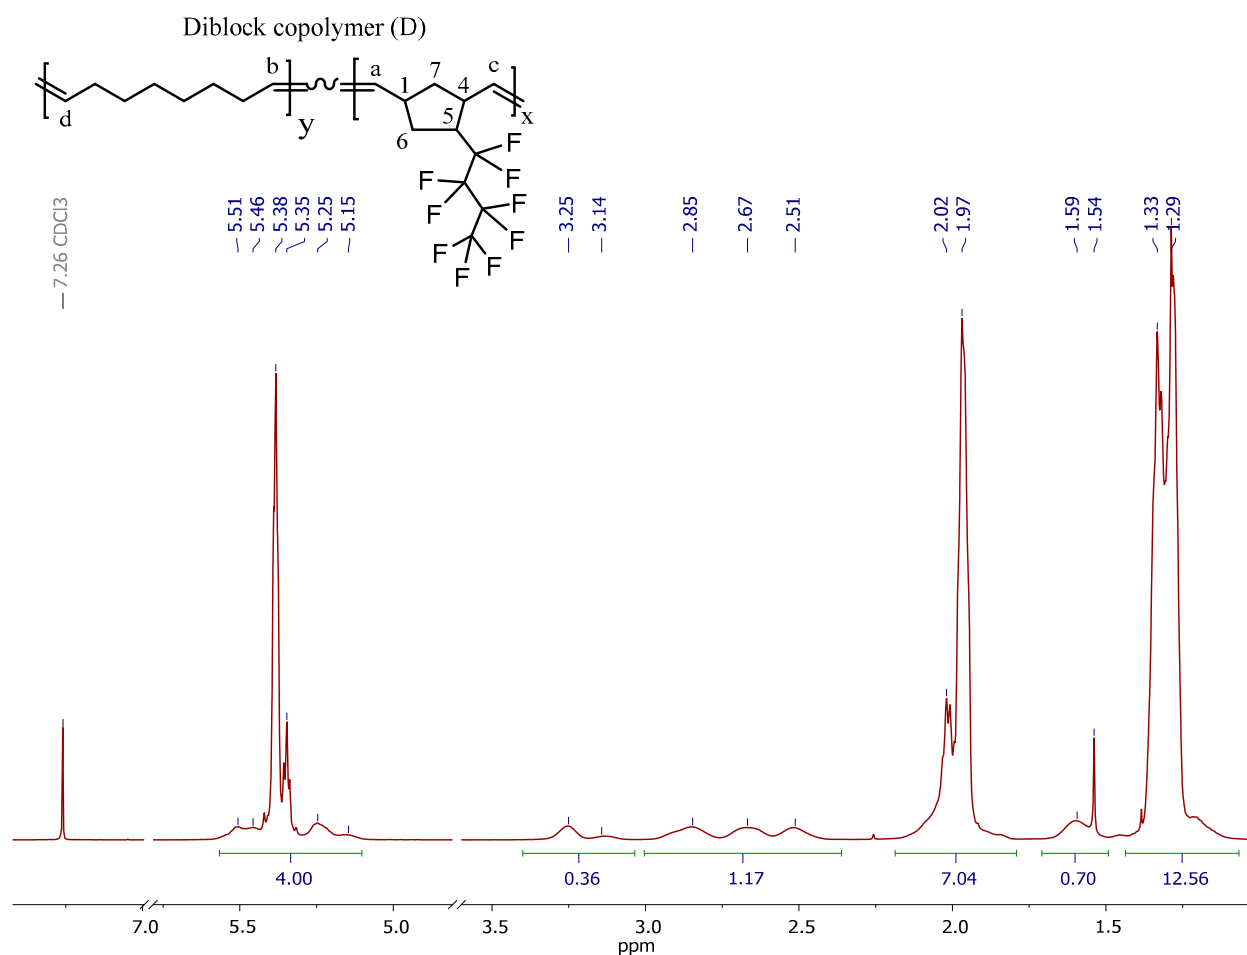

**Figure S13.** <sup>1</sup>H NMR spectrum of NBF–COE diblock D1 copolymer at room temperature.

<sup>1</sup>H NMR (400.1 MHz, CDCl<sub>3</sub>) δ, ppm: 5.51, 5.46, 5.38, 5.35, 5.25, 5.15 (HC=CH, PNBF, PCOE), 3.25 (HC<sup>5</sup>, *cis*, *endo*, PNBF), 3.14 (HC<sup>5</sup>, *cis*, *exo*, PNBF), 2.85 (HC<sup>5</sup>, *trans*, *endo/exo*, PNBF), 2.67 (HC<sup>1,4</sup>, *cis*, PNBF), 2.51 (HC<sup>1,4</sup>, *trans*, PNBF), 2.02, 1.97 ((H<sub>2</sub>C<sup>6</sup>, PNBF; 4H, PCOE), 1.59, 1.54 (H<sub>2</sub>C<sup>7</sup>, PNBF), 1.33, 1.29 (H<sub>2</sub>C<sup>7</sup>, PNBF; 8H, PCOE).

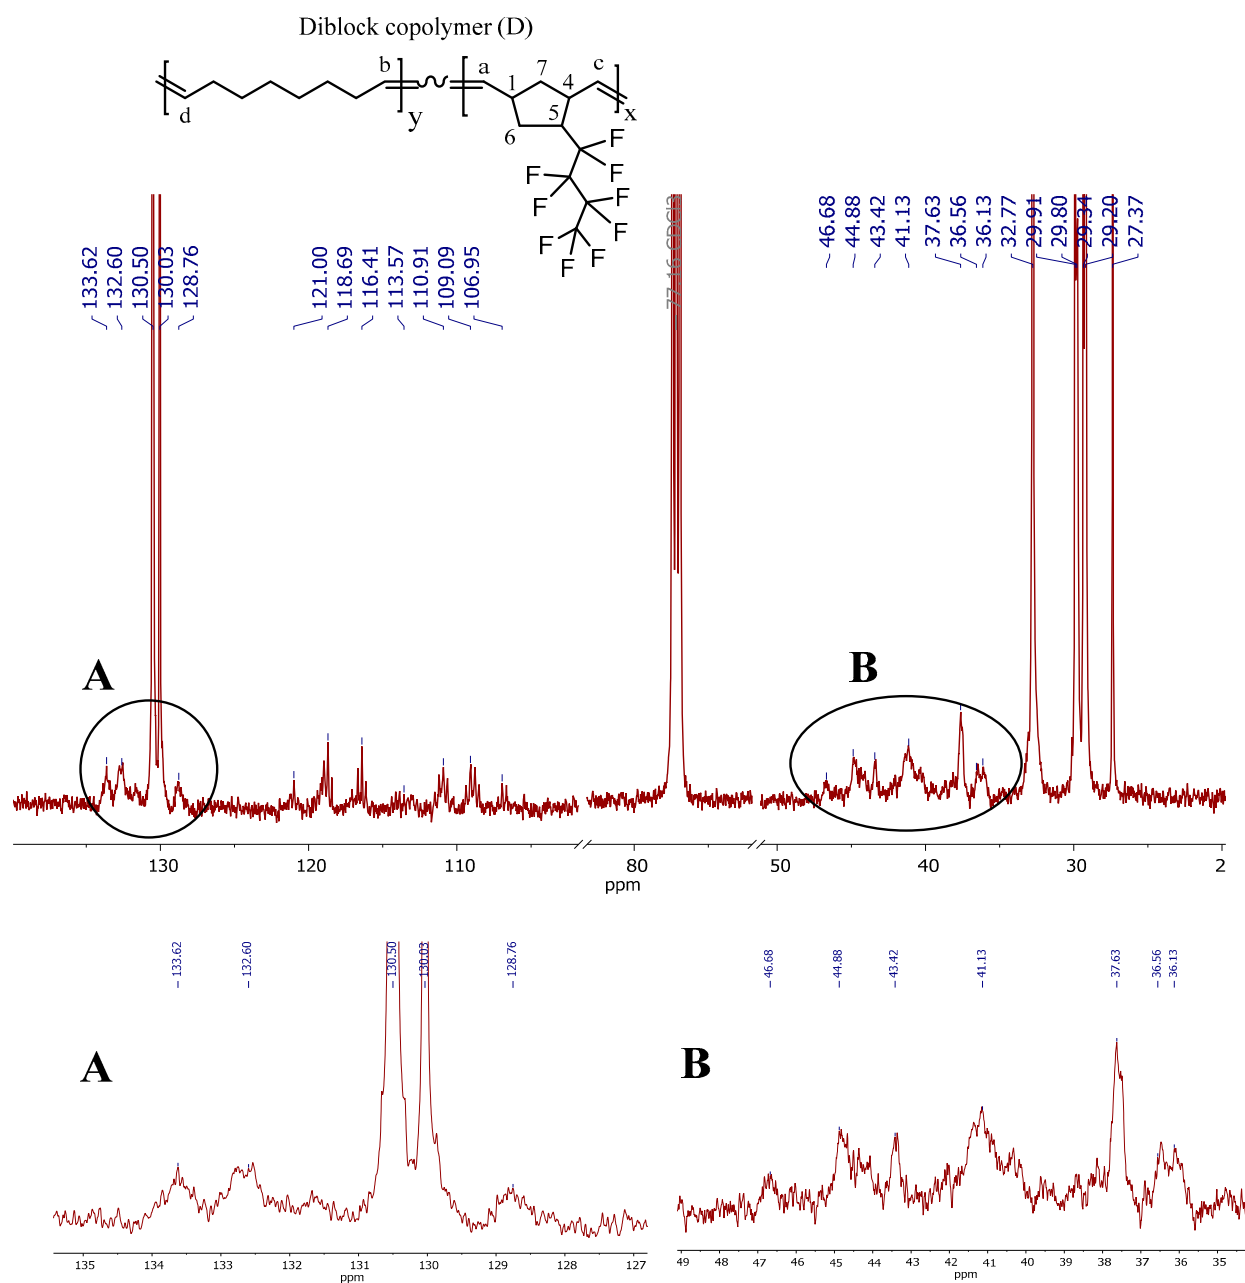

**Figure S14.**  $^{13}\text{C}$  NMR spectrum of NBF–COE diblock D1 copolymer at room temperature.

$^{13}\text{C}$  NMR (100.6 MHz,  $\text{CDCl}_3$ )  $\delta$ , ppm: 133.62, 132.60 ( $\text{C}=\text{C}$ , PNBf), 130.50 ( $\text{C}=\text{C}$  *trans*, PCOE), 130.03 ( $\text{C}=\text{C}$  *cis*, PCOE), 128.76 ( $\text{C}=\text{C}$ , PNBf), 121.00, 118.69, 116.41, 113.57, 110.91, 109.09, 106.95 ( $\text{C}-\text{F}$ ), 46.68 ( $\text{C}^5$ , *exo*, *trans*, PNBf), 44.88, 43.42 ( $\text{C}^{1,5,7}$ , PNBf), 41.13 ( $\text{C}^{4,7}$ , PNBf), 37.63, 36.56, 36.13 ( $\text{C}^{1,4}$ , PNBf), 32.77 ( $\text{C}^6$ , PNBf;  $\text{CH}_2$ , PCOE), 29.91, 29.80, 29.34, 29.20, 27.37 ( $\text{CH}_2$ , PCOE).

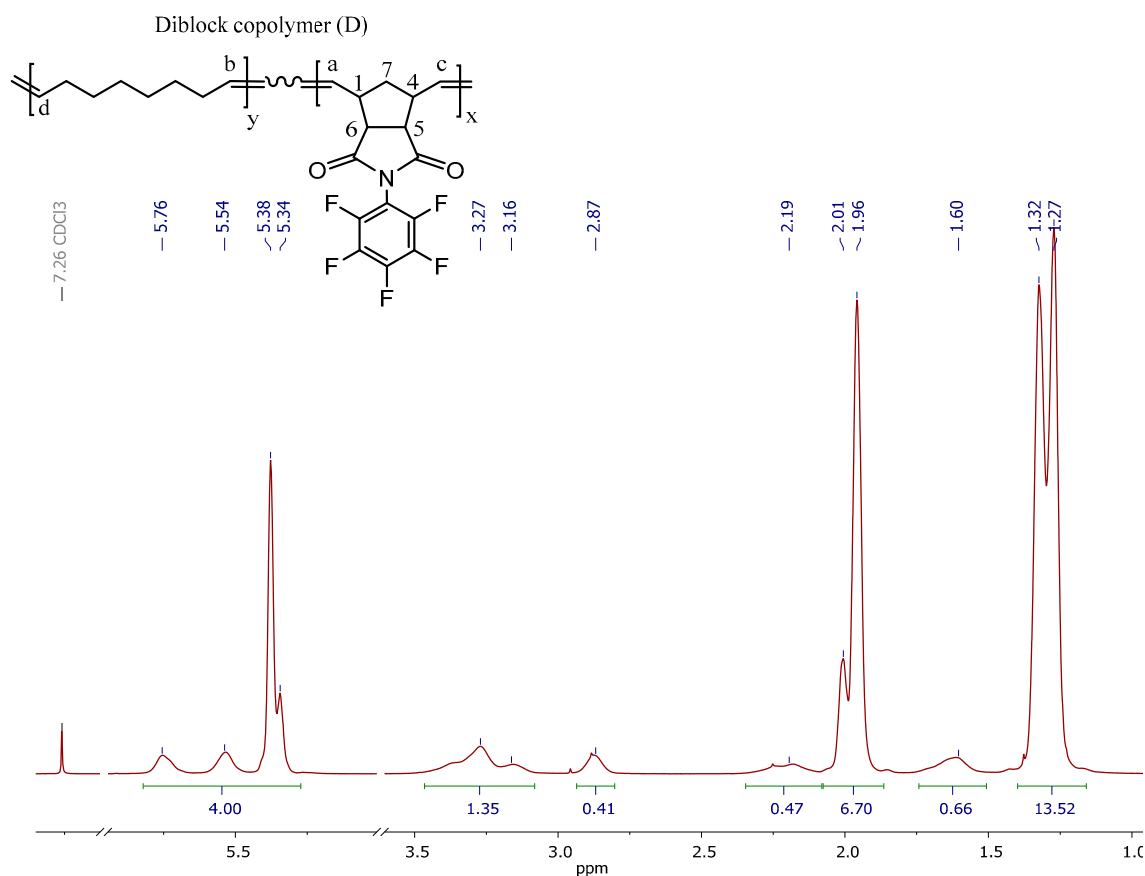

**Figure S15.**  $^1\text{H}$  NMR spectrum of NBFD–COE diblock D2 copolymer at room temperature.

$^1\text{H}$  NMR (400.1 MHz,  $\text{CDCl}_3$ )  $\delta$ , ppm: 5.76 ( $\text{HC}^{\text{a}}=\text{C}^{\text{c}}\text{H}$  *trans*, PNBFD), 5.54 ( $\text{HC}^{\text{a}}=\text{C}^{\text{c}}\text{H}$  *cis*, PNBFD), 5.38 ( $\text{HC}^{\text{b}}=\text{C}^{\text{d}}\text{H}$  *trans*, PCOE), 5.34 ( $\text{HC}^{\text{b}}=\text{C}^{\text{d}}\text{H}$  *cis*, PCOE), 3.27, 3.16, 2.87 (PNBFD), 2.19, 2.01 (PNBFD), 1.96 (PCOE), 1.60 (PNBFD), 1.32, 1.27 (PCOE, PNBFD).

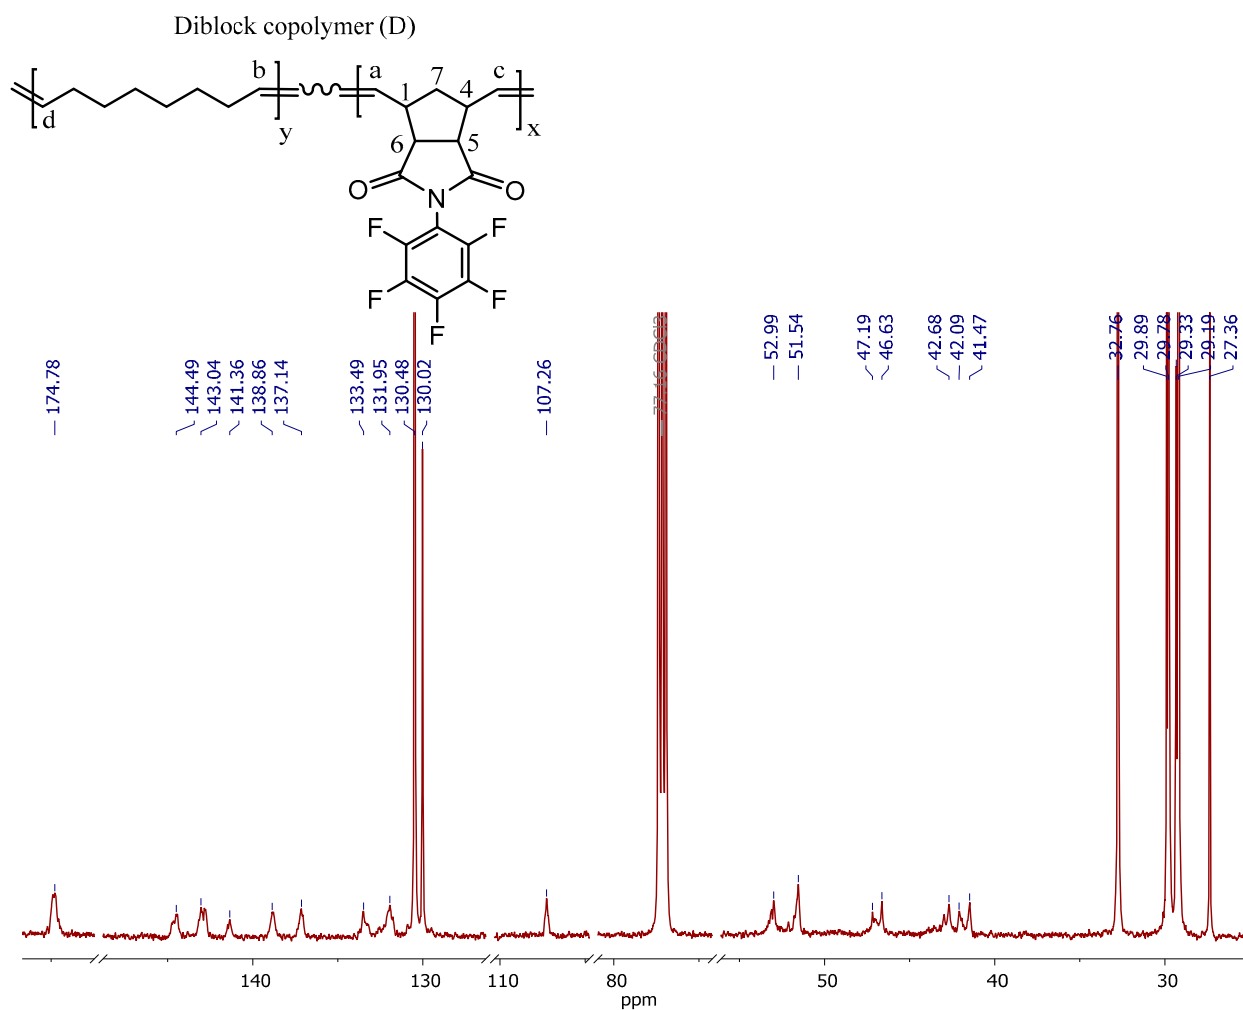

**Figure S16.** <sup>13</sup>C NMR spectrum of NBFD–COE diblock D2 copolymer at room temperature.

<sup>13</sup>C NMR (100.6 MHz, CDCl<sub>3</sub>) δ, ppm: 174.78 (C=O), 144.49, 143.04, 141.36, 138.86, 137.14 (C-F), 133.49 (HC<sup>a</sup>=C<sup>c</sup>H *cis*, PNBFD), 131.95 (HC<sup>a</sup>=C<sup>c</sup>H *trans*, PNBFD), 130.48 (HC<sup>b</sup>=C<sup>d</sup>H *trans*, PCOE), 130.02 (HC<sup>b</sup>=C<sup>d</sup>H *cis*, PCOE), 107.26 (C-N), 52.99 (C<sup>1,4</sup>, *cis*, PNBFD), 51.54 (C<sup>1,4</sup>, *trans*, PNBFD), 47.19, 46.63, 42.68, 42.09, 41.47 (C<sup>5,6,7</sup>, PNBFD), 32.76, 29.89, 29.78, 29.33, 29.19, 27.36 (CH<sub>2</sub>, PCOE).



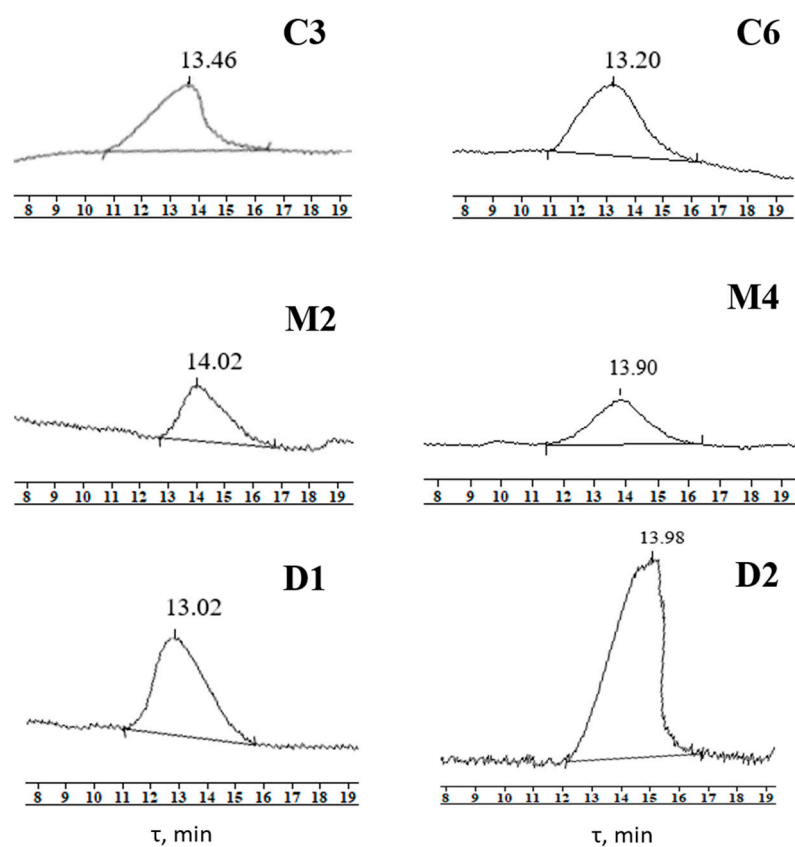

**Figure S17.** GPC curves of different copolymers NBF and NBFD with COE (copolymer D2 was analyzed from a solution in chloroform).
